# Supplementary material
Source: PubMed Central journal article supplement (PMC4552512)

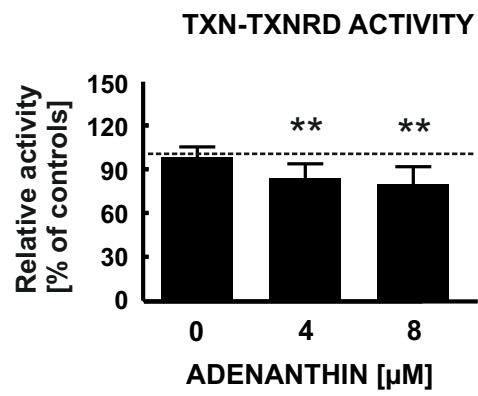

A

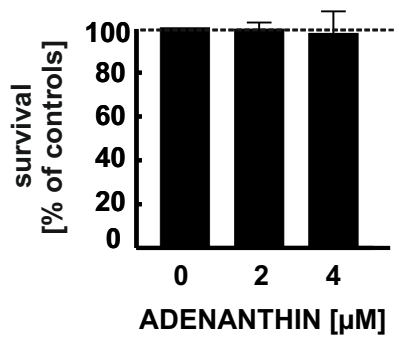

B

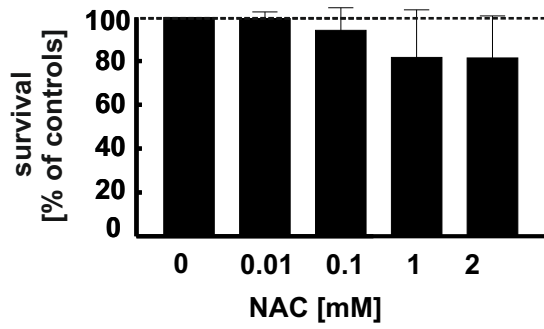

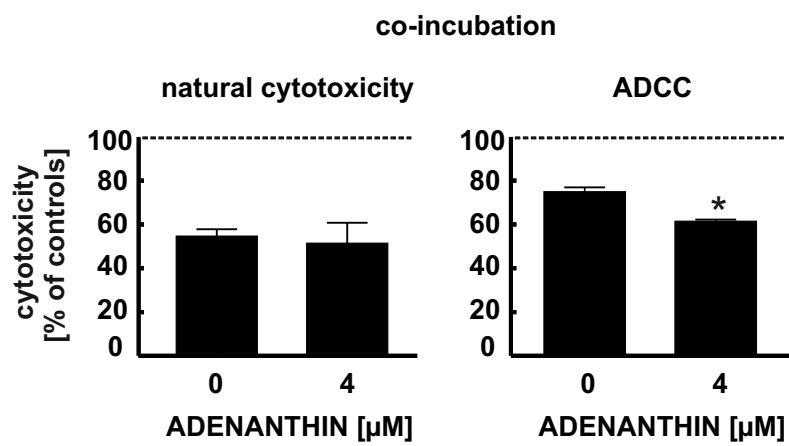

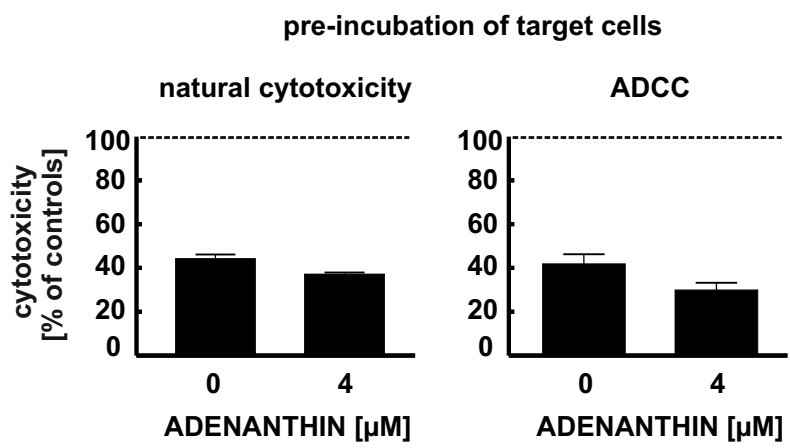

**A**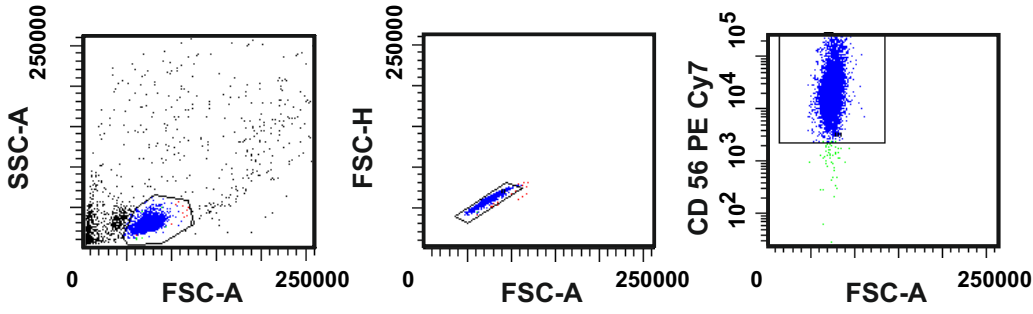**B**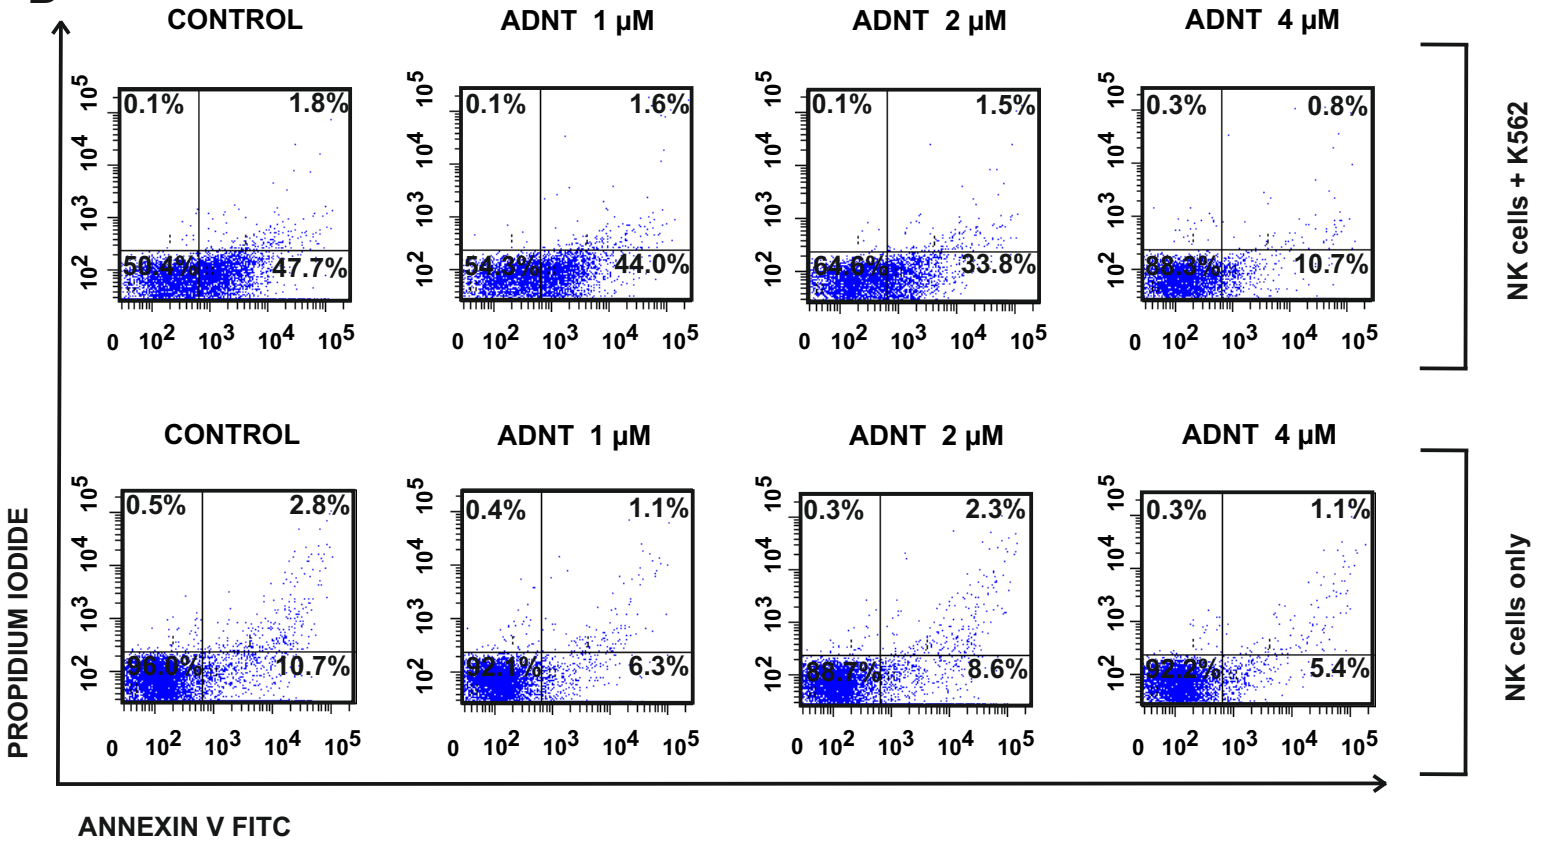

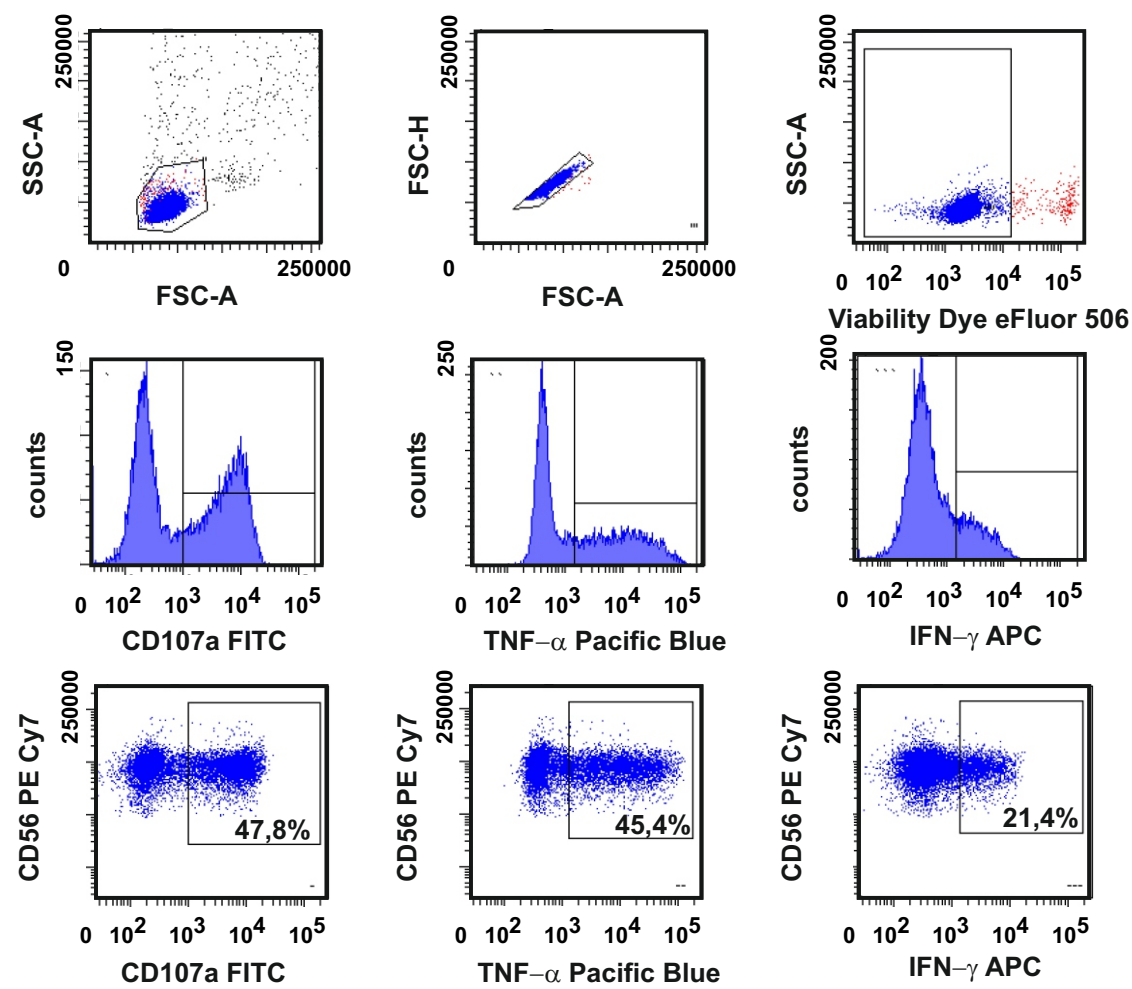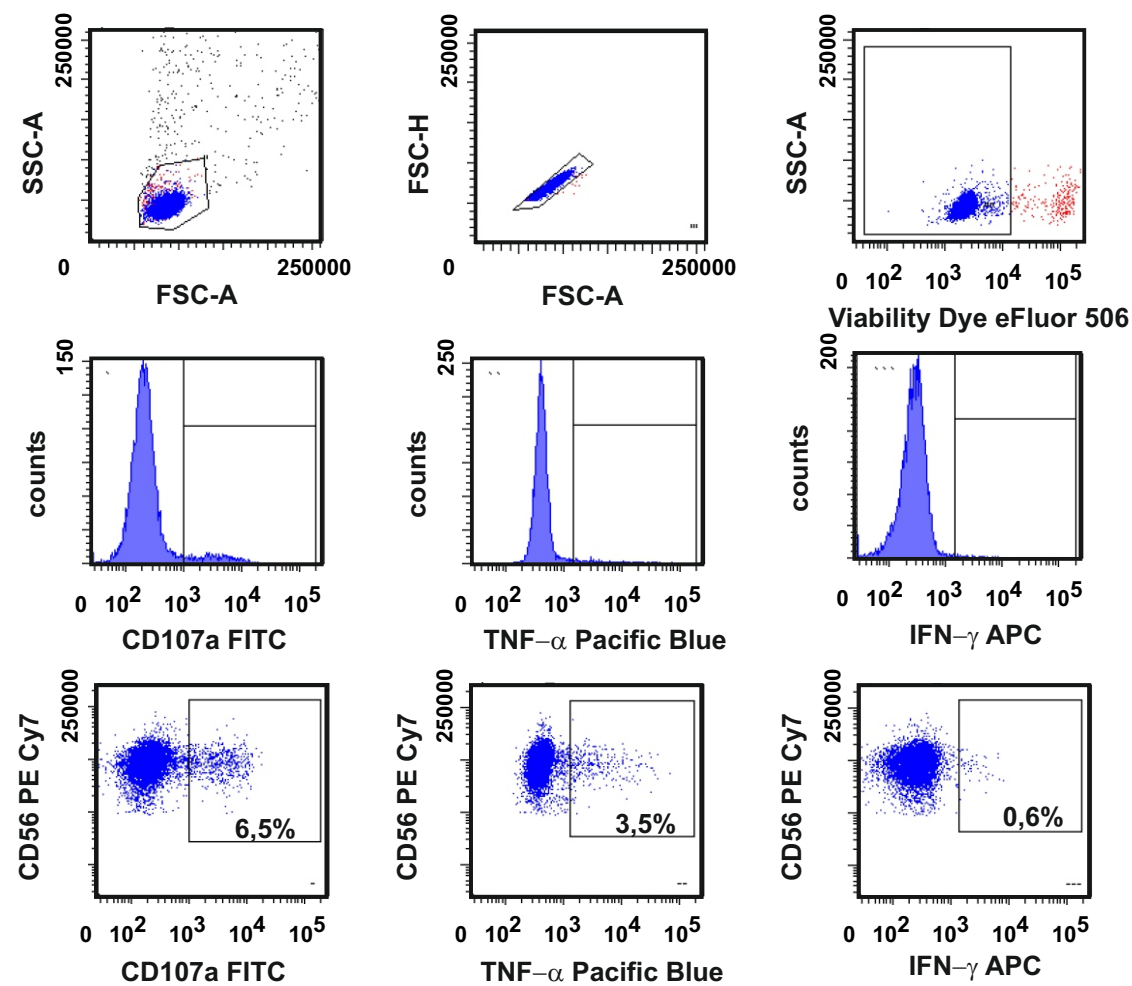

Suppl. Fig.6

Supplement: imm0146-0173-sd1.pdf [file imm0146-0173-sd1.pdf]
